# Supplementary material
Source: PubMed Central journal article supplement (PMC8292158)
Supplement: NIHMS1671248-supplement-1.pdf [file NIHMS1671248-supplement-1.pdf]

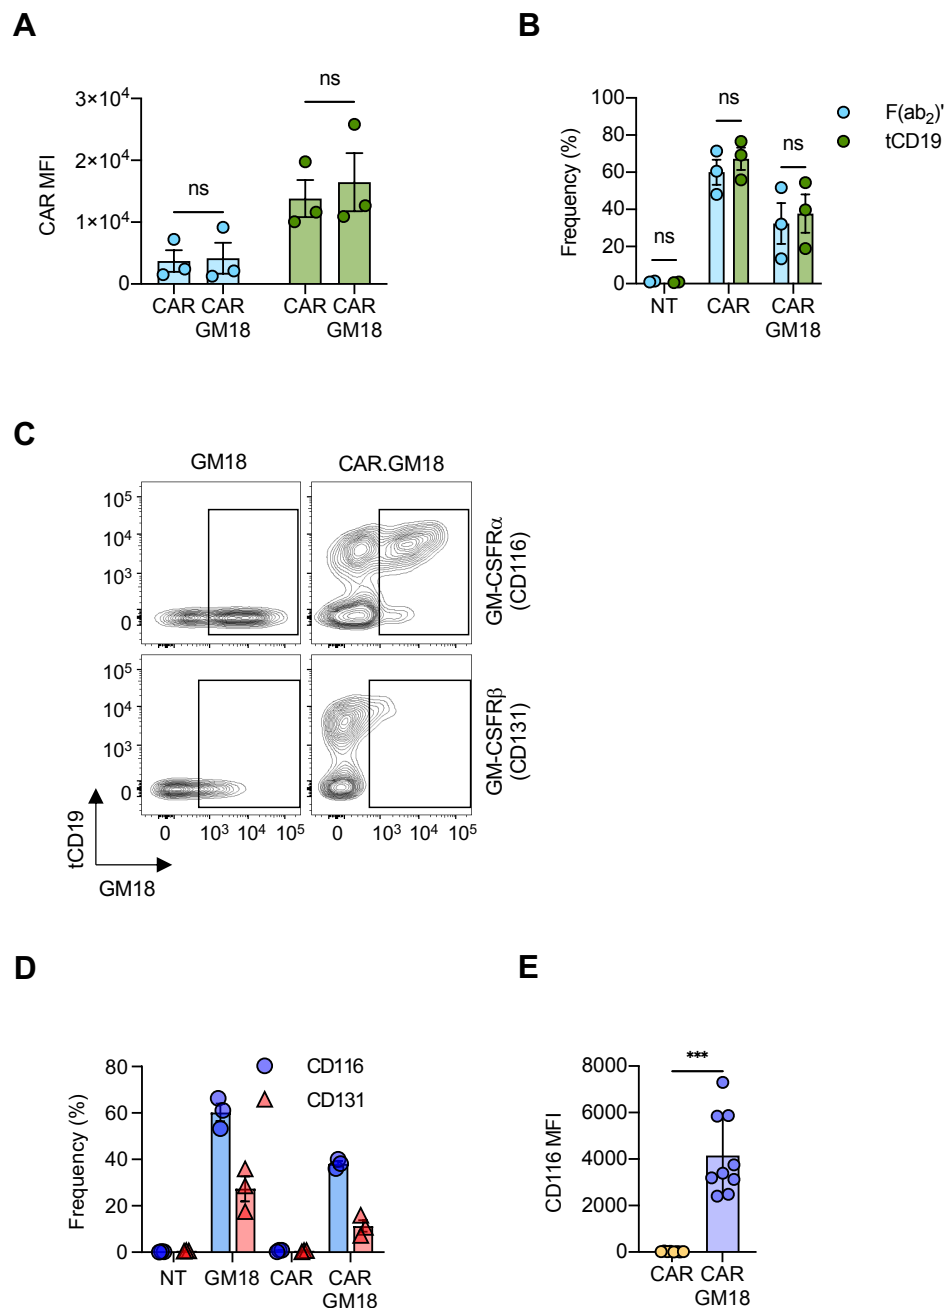

**Supplemental Figure 1: Detection of GM18 via the alpha (CD116) versus beta (CD131) chains of GM-CSF receptor.** CAR surface expression by mean fluorescence intensity (MFI) (A) and frequency (B) comparing tCD19 detection and direct CAR detection with F(ab<sub>2</sub>)', N=3 different donors, mean and +/-SEM is shown, 2-way ANOVA, ns: not significant. (C) Cells were analyzed by FACS for CD116 (X axis, top row) versus CD131 (X axis, bottom row) expression in addition to CD19 detection (Y axis) for the EphA2-CAR. N=3 different donors. Boxes indicate positive gates. (D) Frequency of live cells expressing either CD116 (blue) or CD131 (red) as determined by flow cytometry. Error bars indicate SEM. (E) CD116 MFI on CAR and CAR.GM18 T-cells, N=9 different donors, mean and +/-SEM is shown, T-test, p<0.001.

**A***Gating strategy:*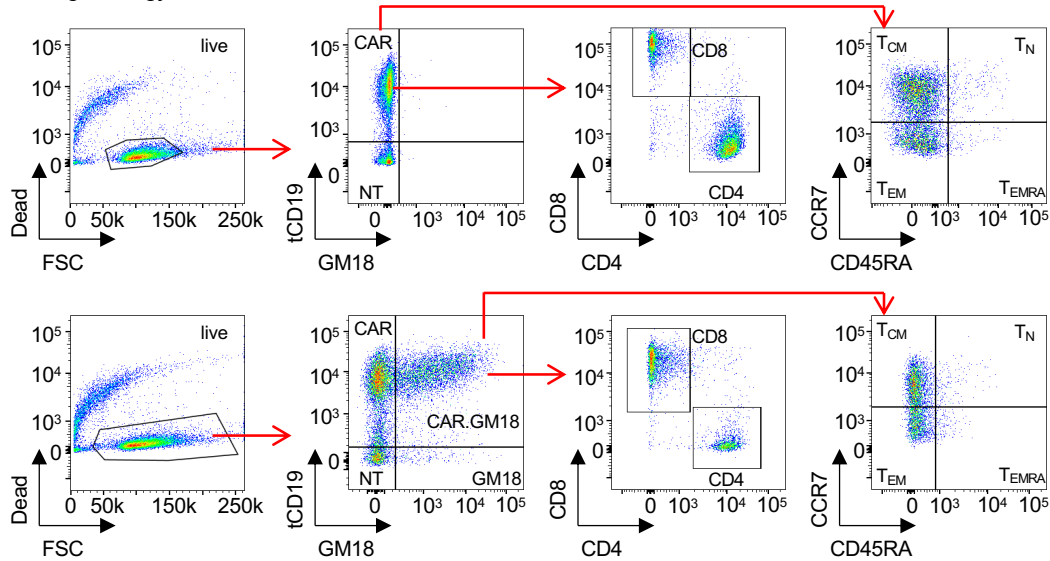**B**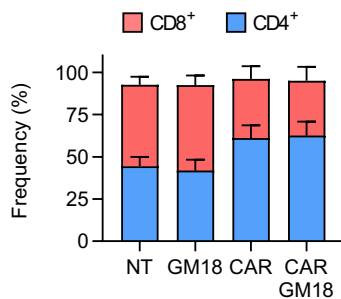**C**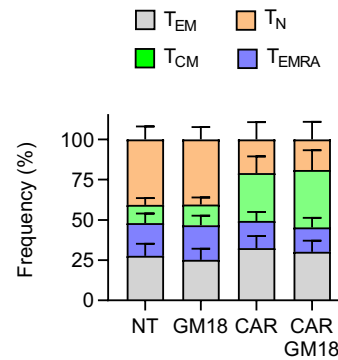

**Supplemental Figure 2: Phenotype of EphA2-CAR and EphA2-CAR.GM18 T-cells.** (A) Gating strategy of CAR transduced (top) and CAR.GM18 double transduced cells (bottom). (B,C) Non-transduced (NT), GM18, EphA2-CAR (CAR), or EphA2-CAR.GM18 (CAR.GM18) T-cells were analyzed by flow cytometry 5-10 days post transduction for surface expression of (B) CD4 and CD8 and (C) CCR7 and CD45RA gated on transduced T-cells for GM18, CAR, and CAR.GM18 T-cells. Effector memory (T<sub>EM</sub>): CCR7<sup>-</sup>, CD45RA<sup>-</sup>; Central memory (T<sub>CM</sub>): CCR7<sup>+</sup>, CD45RA<sup>-</sup>; Naïve-like (T<sub>N</sub>): CCR7<sup>+</sup>CD45RA<sup>+</sup>; Terminally differentiated subset that expresses CD45RA (T<sub>EMRA</sub>): CCR7<sup>-</sup>, CD45RA<sup>+</sup>. N=6 different donors; mean and +/-SEM is shown. Two-way ANOVA; no significant differences between T-cell subsets.

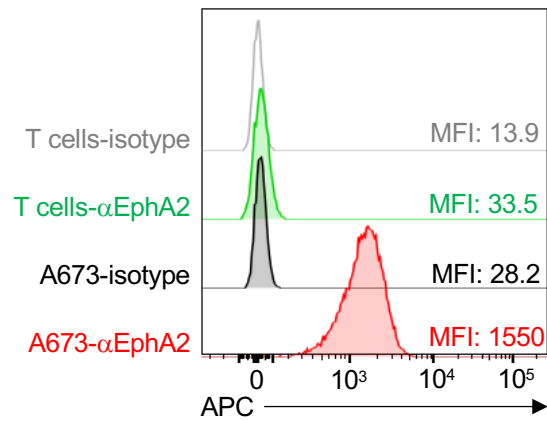

**Supplemental Figure 3: Surface expression of target antigens on A673 Ewing sarcoma cell line.** A673 tumor cells from culture were stained with antibodies detecting EphA2 (red) or isotype control (gray). Human T-cells were also stained with anti-EphA2-APC and isotype control as negative controls (black). MFI: mean fluorescent intensity.

**A**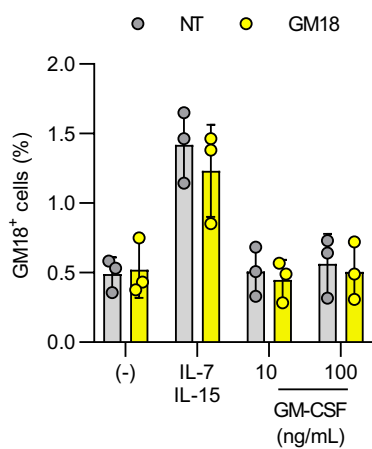**B**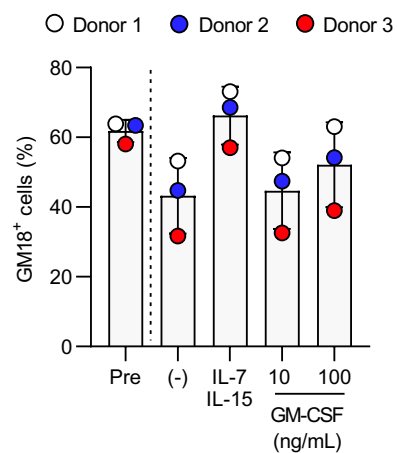

**Supplemental Figure 4: Expansion of CAR.GM18 T-cells is not induced by GM-CSF. (A,B)** GM18 or non-transduced (NT) were treated with IL-7 (10 ng/mL) + IL-15 (5 ng/mL), 10 ng/mL GM-CSF, 100 ng/mL GM-CSF, or no exogenous cytokines (-) for 5 days. **(A)** Fold expansion of NT T-cells (gray) and GM18 T-cells (yellow). **(B)** Frequency of GM18<sup>+</sup> live cells in GM18 transduced cells after cytokine treatment as determined by flow cytometry, N=3 different donors, mean and +/-SEM is shown.

A

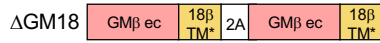

B

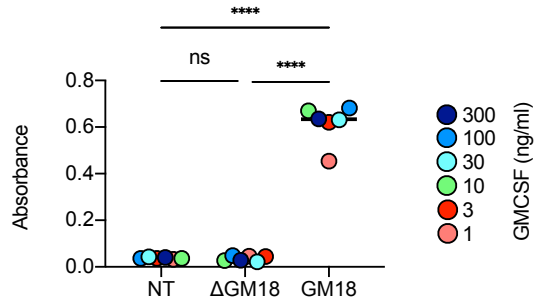

C

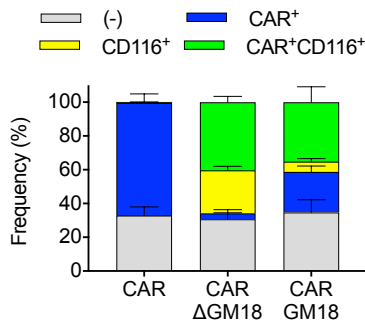

D

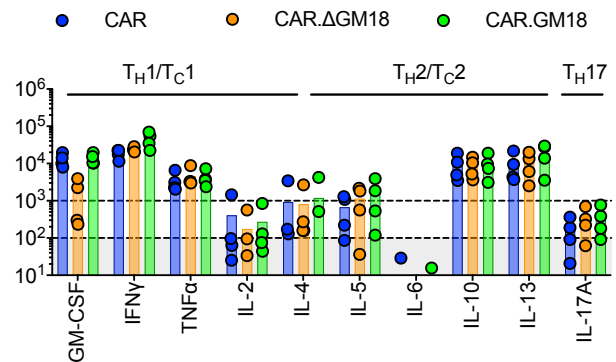

E

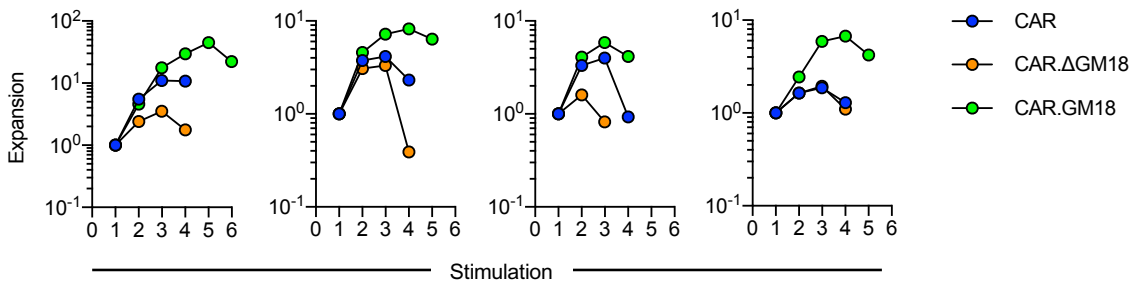

**Supplemental Figure 5: Truncating the intracellular signaling domains of GM18 abolishes its functional benefits in EphA2-CAR T-cells.** (A) Schematic of  $\Delta$ GM18 construct; GM: GM-CSF receptor; 18: IL-18 receptor; ec: extracellular domain, and TM\*: transmembrane domain + 10 a.a. of intracellular domain. (B) Colorimetric detection of NF $\kappa$ B activity in GM-CSF-treated non-transduced (NT), GM18 transduced (GM18) or GM<sup>stop</sup> transduced ( $\Delta$ GM18) Ramos-Blue reporter cells, 2-way ANOVA, \*\*\*\* $p < 0.0001$ , ns: not significant. (C) Transduction efficiency of EphA2-CAR, GM18, or  $\Delta$ GM18 in human T-cells (N=3 different donors) prior to sorting as measured by flow analysis for the GM-CSFR alpha chain (anti-CD116) and CAR (anti-CD19). (D) Cytokine production by sorted CAR T-cells after one stimulation with A673 tumor cells at 2:1 E:T ratio measured by multiplex analysis, N=4 different donors. (E) Sorted CAR T-cell expansion following serial coculture with fresh A673 tumor cells weekly. Fold expansion of CAR, CAR. $\Delta$ GM18, and CAR.GM18 T-cells, N=4 different donors graphed individually.

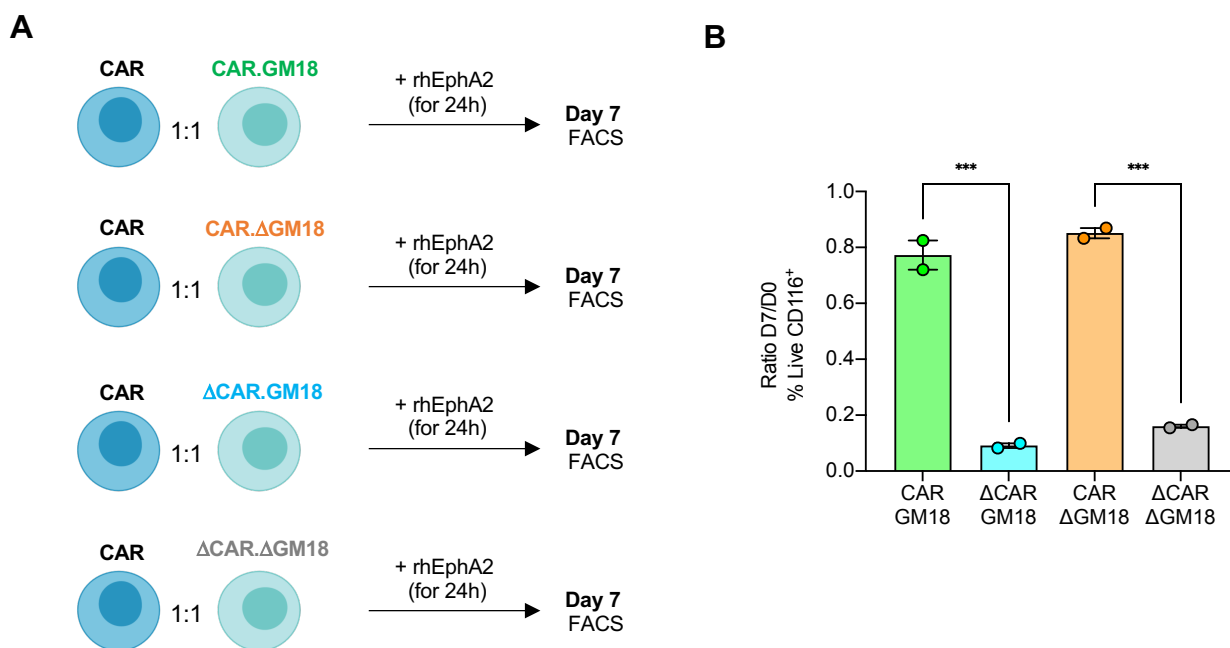

**Supplemental Figure 6: Expansion of CAR.GM18 T-cells is not induced by activated bystander CAR T cells.** (A) Experimental setup: Sorted EphA2-CAR T-cells were combined with either CAR.GM18 (green), CAR.ΔGM18 (orange), delta (Δ)-CAR.GM18 (blue), or ΔCAR.ΔGM18 (gray) at a 1:1 ratio and stimulated with recombinant hEphA2 protein (200ng per  $1 \times 10^6$  cells) for 24 hours without exogenous cytokines and cultured for 7 days. (B) Frequency of CAR<sup>+</sup>CD116<sup>+</sup> cells were acquired at day 0 and day 7 and the ratio is shown, N=2 different donors, mean and +/-SEM is shown, 2-way ANOVA, \*\*\*p<0.001.

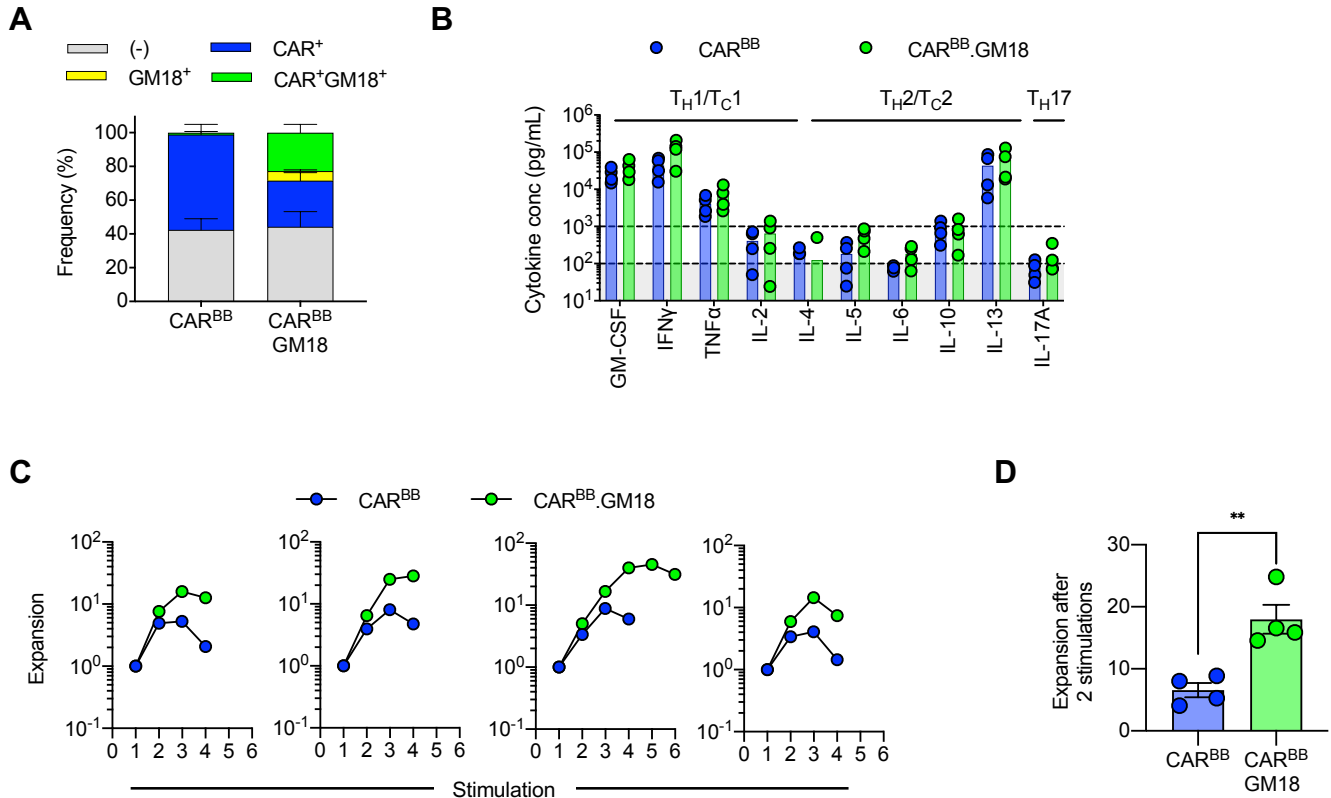

**Supplemental Figure 7: GM18 improves effector function in vitro of EphA2-CAR T-cells with 4-1BB costimulatory domain.** (A) Transduction efficiency of 4-1BB EphA2-CAR (CAR<sup>BB</sup>) and GM18 in human T-cells (N=4 different donors) prior to sorting as measured by flow analysis for the GM-CSFR alpha chain (anti-CD116) and CAR (anti-CD19). (B) Cytokine production by sorted CAR T-cells after one stimulation with A673 tumor cells at 2:1 E:T ratio measured by multiplex analysis, N=4 different donors. (C) Sorted CAR T-cell expansion following serial coculture with fresh A673 tumor cells weekly. Fold expansion of CAR<sup>BB</sup> and CAR<sup>BB</sup>.GM18 T-cells; N=4 different donors graphed individually. (D) Summary data of expansion of CAR<sup>BB</sup> and CAR<sup>BB</sup>.GM18 T-cells after 2 stimulations, \*\*p<0.01, paired T-test.

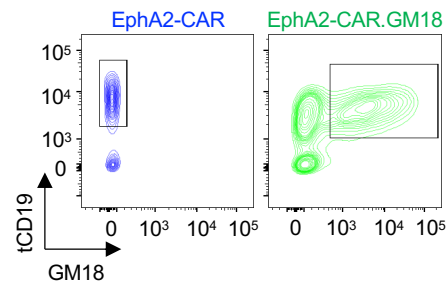

**Supplemental Figure 8: EphA2-CAR and EphA2-CAR.GM18 sorted T-cells for *in vivo* analysis.** Representative flow cytometry plots of CAR T-cells sorted for the animal experiment shown in **Figure 3B**. Boxes indicate cells that were purified for injection.



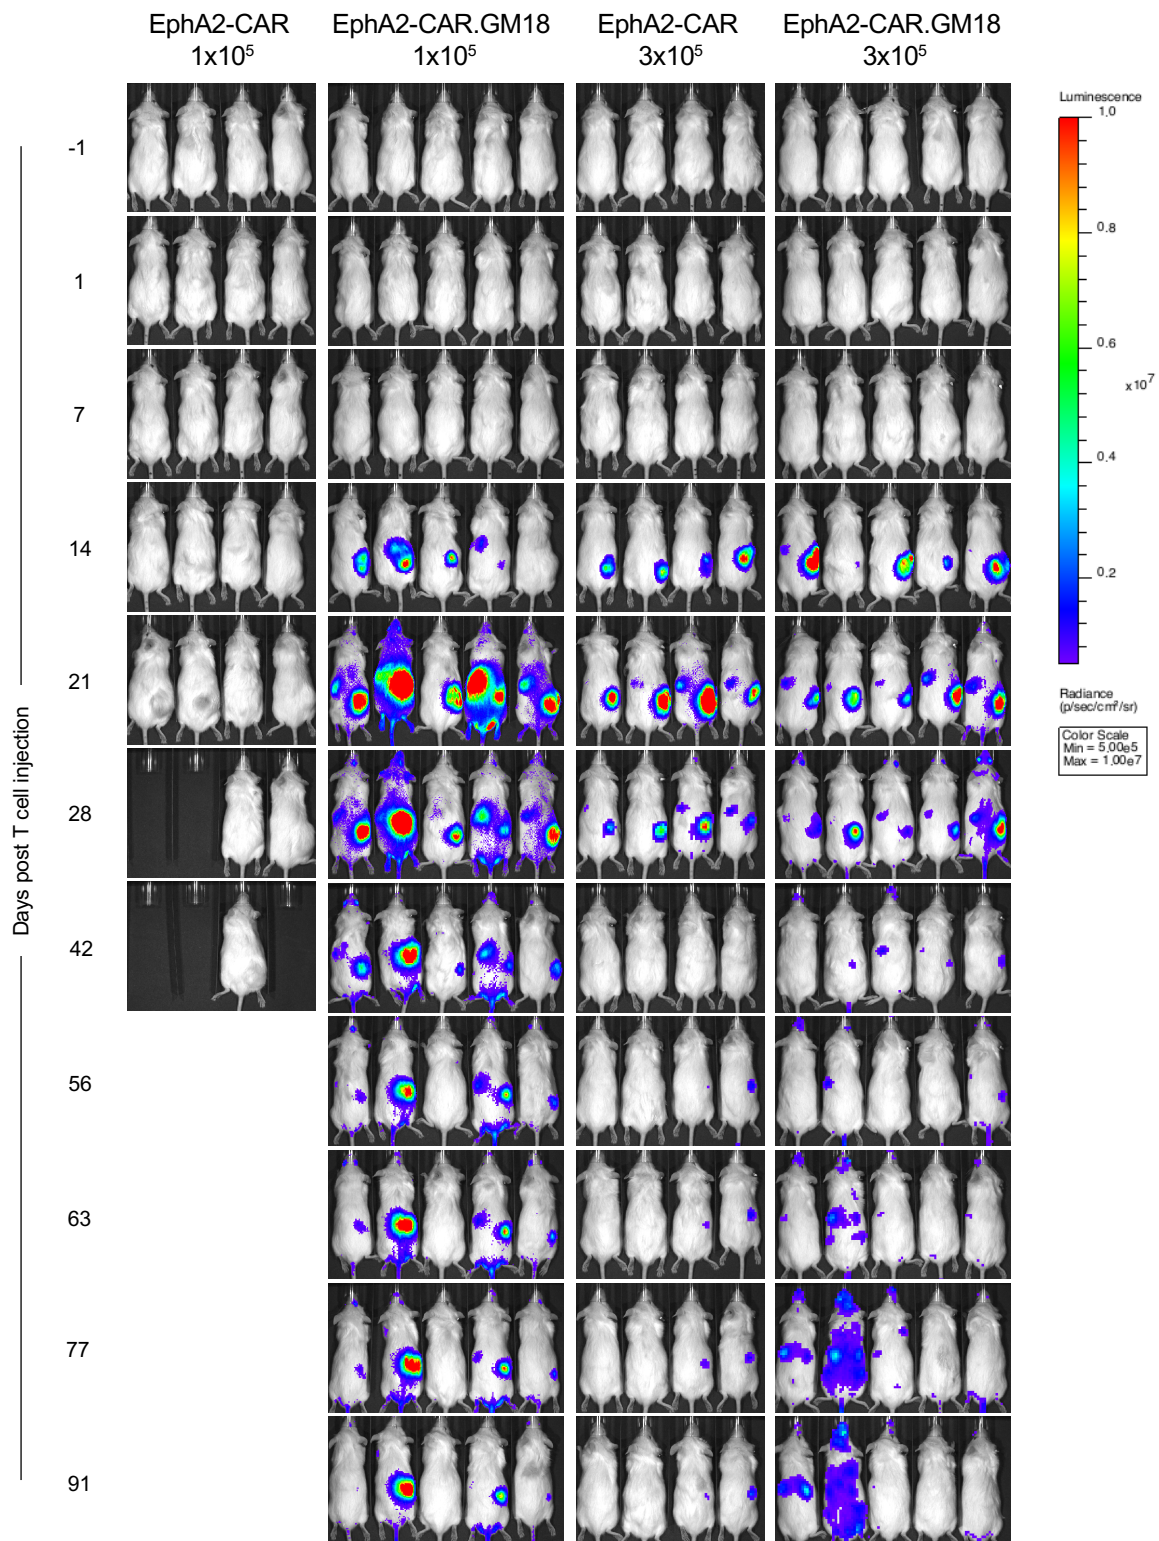

**Supplemental Figure 9: Bioluminescence imaging of EphA2-CAR and EphA2-CAR.GM18 T cells in A673 xenograft model.** Representative bioluminescence images of the animal experiment shown in Figure 3B.

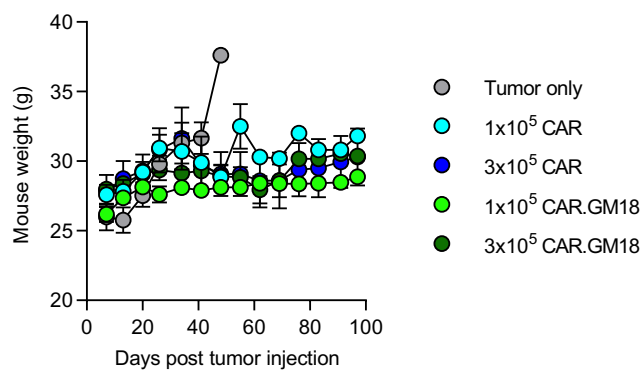

**Supplemental Figure 10: Mice continue to gain weight post EphA2-CAR and EphA2-CAR.GM18 T-cell infusion.** Weights of mice for animal experiment shown in **Figure 3B**.

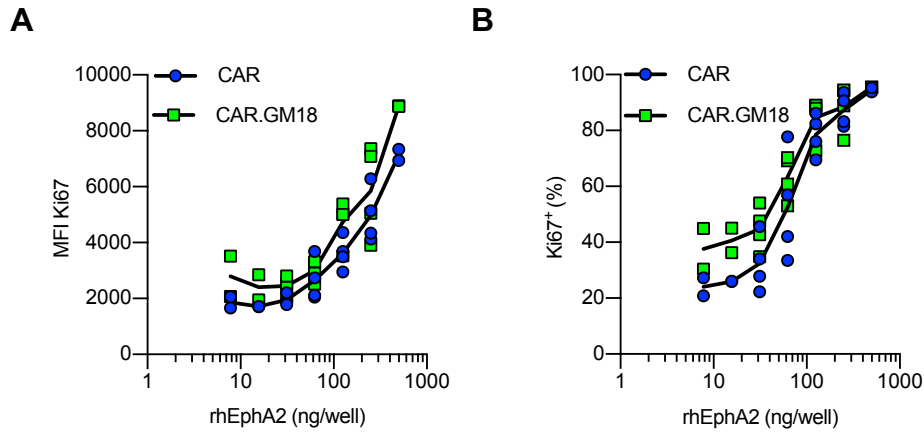

**Supplemental Figure 11: Proliferative state of CAR.GM18 T-cells is dictated by amount of antigenic stimulation.** (A,B) EphA2-CAR (blue) and EphA2-CAR.GM18 (green) T-cells were stimulated with titrated amounts of recombinant hEphA2 for 24 hours without exogenous cytokines and cultured for 7 days. Ki67 expression within CAR<sup>+</sup> and CAR<sup>+</sup>GM18<sup>+</sup> was measured and MFI (A) and population frequency (B) are shown. N=4 different donors (except for 7.8, 15.625, 500 ng/well: N=2 different donors).

**A**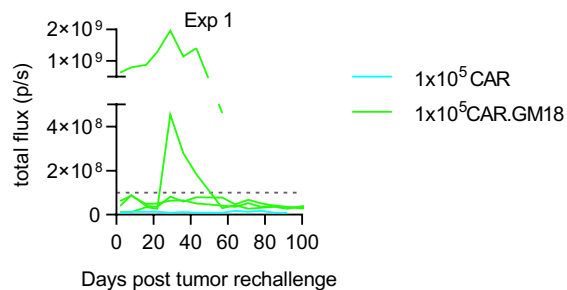**B**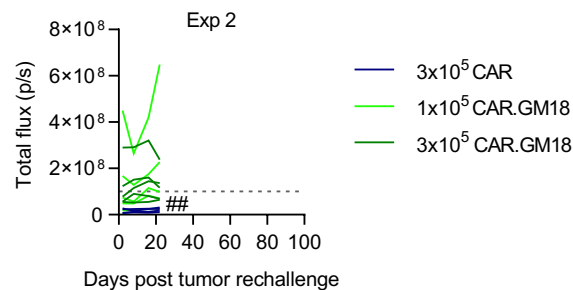

**Supplemental Figure 12: EphA2-CAR and EphA2-CAR.GM18 T-cell persistence post A673 tumor rechallenge.** Bioluminescence imaging of mice of the rechallenge experiment shown in **Figure 3G,H**. **(A)** Experiment 1 (Exp 1). **(B)**: Experiment 2 (Exp 2); ##: experiment was terminated on day 23 post tumor rechallenge due to COVID19.

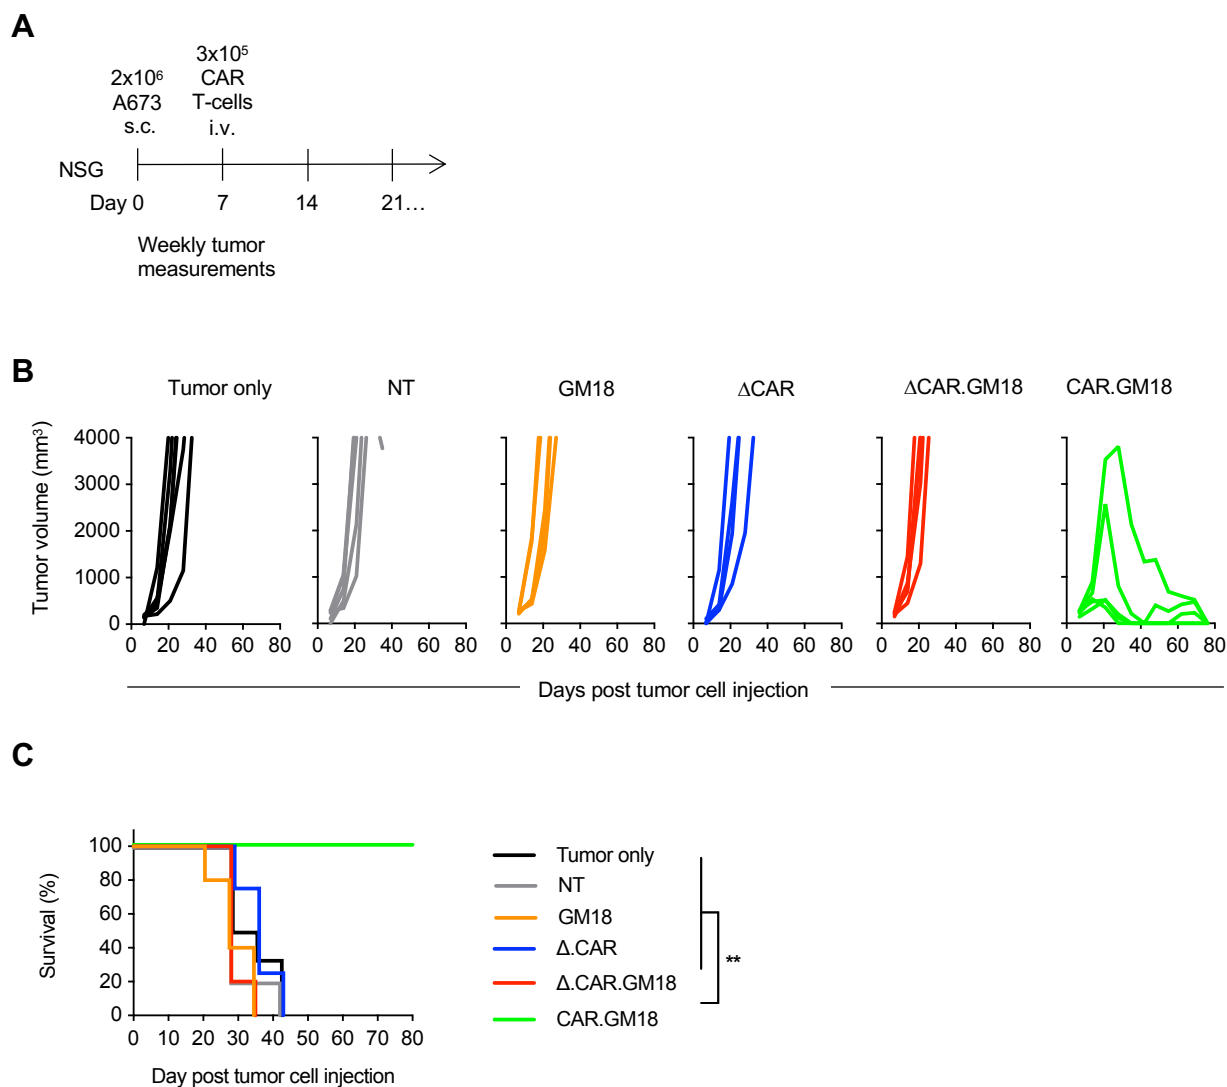

**Supplemental Figure 13: GM18 T-cells do not display alloreactivity independent of EphA2-CAR activation *in vivo*.** (A) Weights of mice for animal experiment shown in Figure 3B. (B-C) NSG mice were injected with 2x10<sup>6</sup> A673 cells s.c. followed by i.v. injection of 3x10<sup>5</sup> CAR T-cells on day 7. Tumors were measured weekly by calipers. (B) Tumor volume of untreated (black, N=6), non-transduced (NT) (gray, N=5), GM18 (orange, N=5), Δ-CAR (blue, N=4), Δ-CAR.GM18 (red, N=5), and EphA2-CAR.GM18 (green, N=5) T-cell treated mice. (C) Kaplan-Meier survival curve; \*\*p<0.01; Log-rank (Mantel- Cox) test.

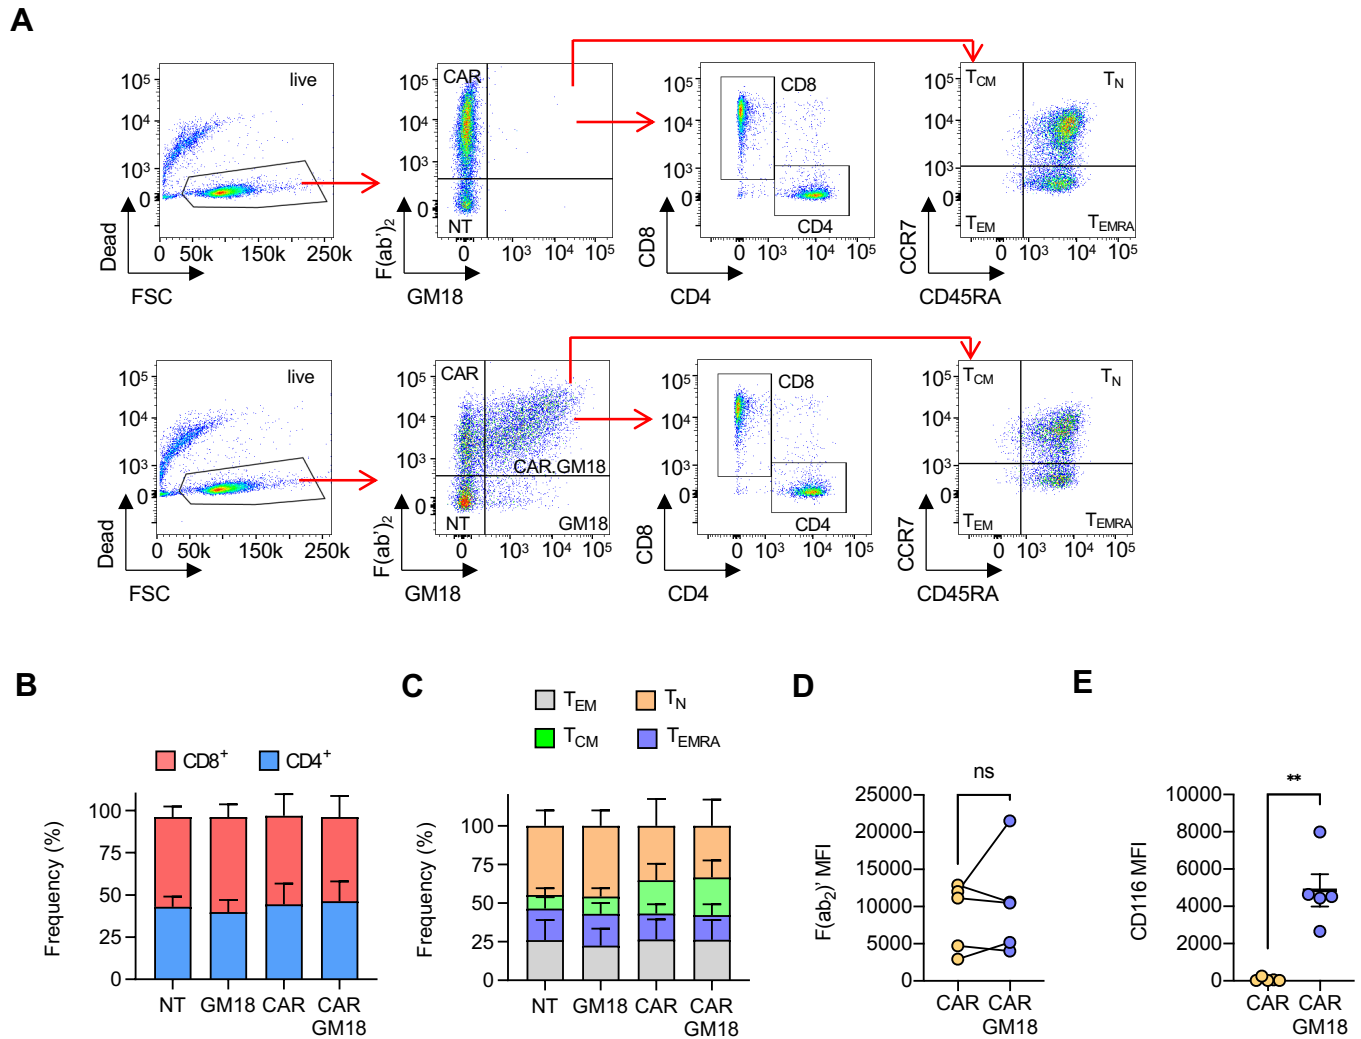

**Supplemental Figure 14: Phenotype of HER2-CAR and HER2-CAR.GM18 T-cells. (A)** Gating strategy of CAR transduced (top) and CAR.GM18 double transduced cells (bottom). **(B,C)** Non-transduced (NT), GM18, HER2-CAR (CAR), or HER2-CAR.GM18 (CAR.GM18) T-cells were analyzed by flow cytometry 5 days post transduction for surface expression of **(B)** CD4 and CD8 and **(C)** CCR7 and CD45RA gated on transduced T-cells for GM18, CAR, and CAR.GM18 T-cells. Effector memory ( $T_{EM}$ ): CCR7<sup>-</sup>, CD45RA<sup>-</sup>; Central memory ( $T_{CM}$ ): CCR7<sup>+</sup>, CD45RA<sup>-</sup>; Naïve-like ( $T_N$ ): CCR7<sup>+</sup>CD45RA<sup>+</sup>; Terminally differentiated subset that expresses CD45RA ( $T_{EMRA}$ ): CCR7<sup>-</sup>, CD45RA<sup>+</sup>. N=3 different donors; mean and +/-SEM is shown. Two-way ANOVA; no significant differences between T-cell subsets. **(D,E)** MFI of the CAR as detected by F(ab')<sub>2</sub> **(D)** and GM18 detected by CD116 expression **(E)**. Cells from the same donor are linked in panel C. N=5 different donors, Error bars indicate SEM, paired t-Test, \*\*p<0.01, ns: not significant).

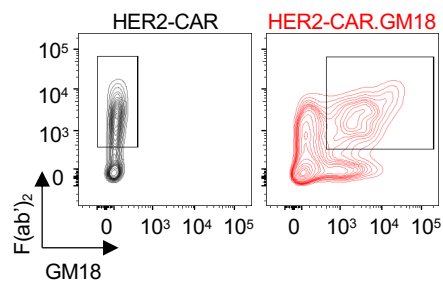

**Supplemental Figure 15: HER2-CAR and HER2-CAR.GM18 sorted T-cells for *in vivo* analysis.** Representative flow cytometry plots of CAR T-cells sorted for the animal experiment shown in **Figure 4G**. Boxes indicate cells that were purified for injection.

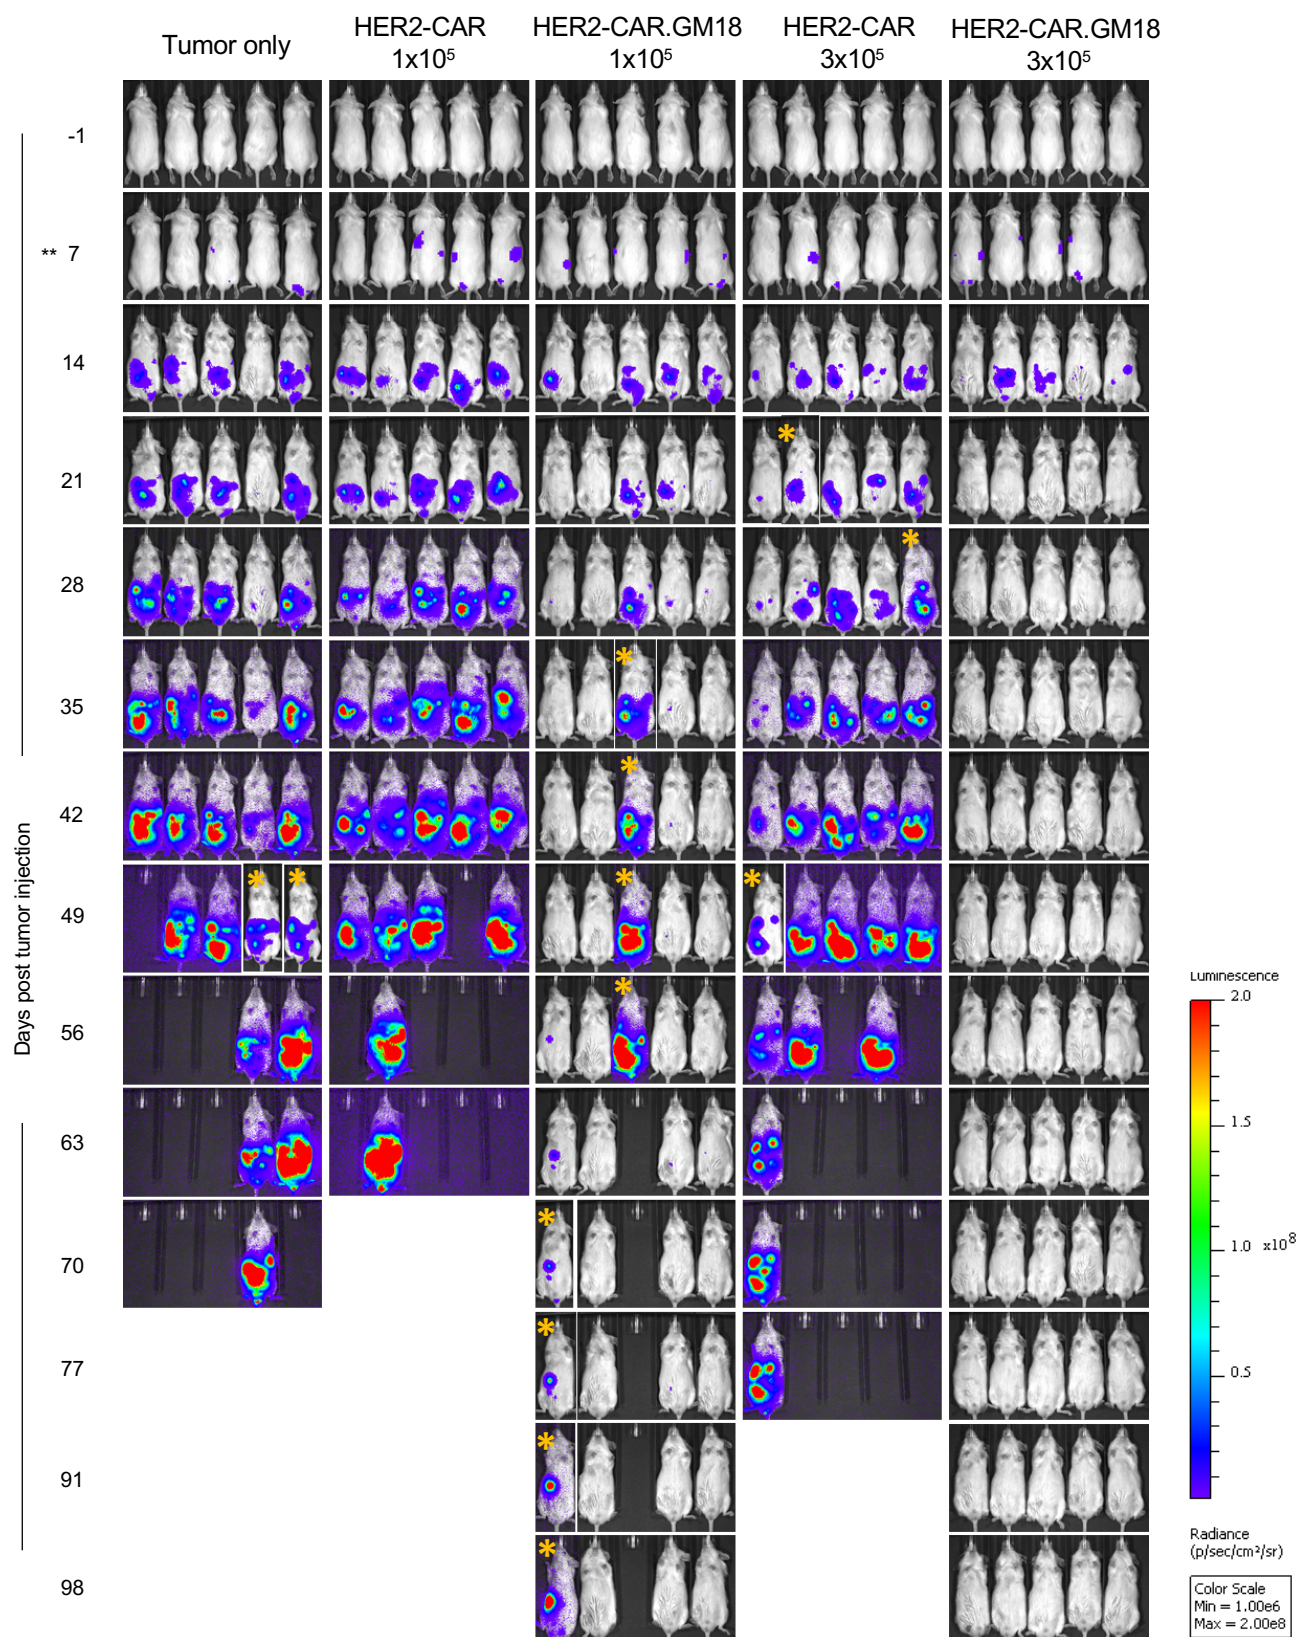

**Supplemental Figure 16: Bioluminescence imaging of LM7-ffLuc tumor cells in osteosarcoma xenograft model.** Representative bioluminescence images of the animal experiment shown in **Figure 4G**. \*\* indicate CAR T cells were injected after day 7 imaging. Of note Day-1 and Day 7 imaging was done with mice in prone position; all other imaging with mice in supine position. Mice were imaged in groups of 5; several mice needed to be imaged separately to prevent 'signal bleed to or from adjacent mice' or for technical reasons (marked with '\*').



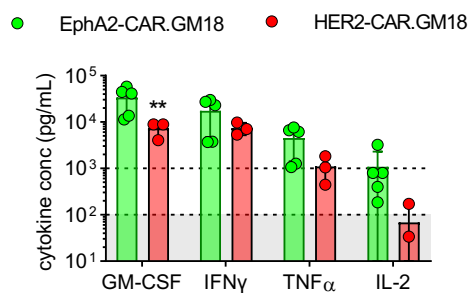

**Supplemental Figure 17: Comparison of cytokine production of EphA2-CAR.GM18 and HER2-CAR.GM18 T-cells.** Comparison of cytokine production post 1<sup>st</sup> stimulation shown in **Figure 2B** for EphA2-CAR.GM18 T cells (N=5) and **Figure 4D** for HER2-CAR.GM18 T cells (N=3 different donors); \*\*p=0.0054; two-way ANOVA.
